# Supplementary material for: Atomic layer deposition of Pd nanoparticles and single atoms on self-supported carbon monolithic catalysts synergistically boosts the hydrogen evolution reaction
Source: Royal Society of Chemistry journal article supplement (doi:10.1039/d4ta04359f), 2024-01-01
Supplement: d4ta04359f1.pdf [file d4ta04359f1.pdf]

**Supporting information for**  
*Atomic layer deposition of Pd nanoparticles and single atoms on  
self-supported carbon monolithic catalysts synergistically boost  
hydrogen evolution reaction*

Bin Zhang, Xulong Song, Zhiheng Wang, Binbin Xu, Tuo Ji, Lilong Zhang, Xiaohua Lu, and

Jiahua Zhu\*

State key Laboratory of Materials-oriented Chemical Engineering, College of Chemical  
Engineering, Nanjing Tech University, Nanjing 211816, China

\*Corresponding author. J.Z. E-mail: [jhzhu@njtech.edu.cn](mailto:jhzhu@njtech.edu.cn)

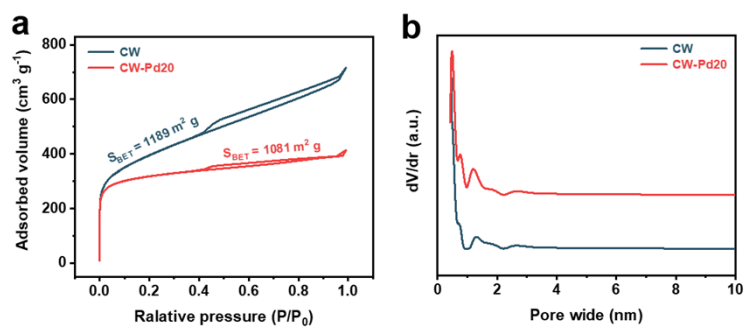

**Figure S1.** (a)  $N_2$  adsorption/desorption isotherms and (b) pore size distribution of CW and CW-Pd20.

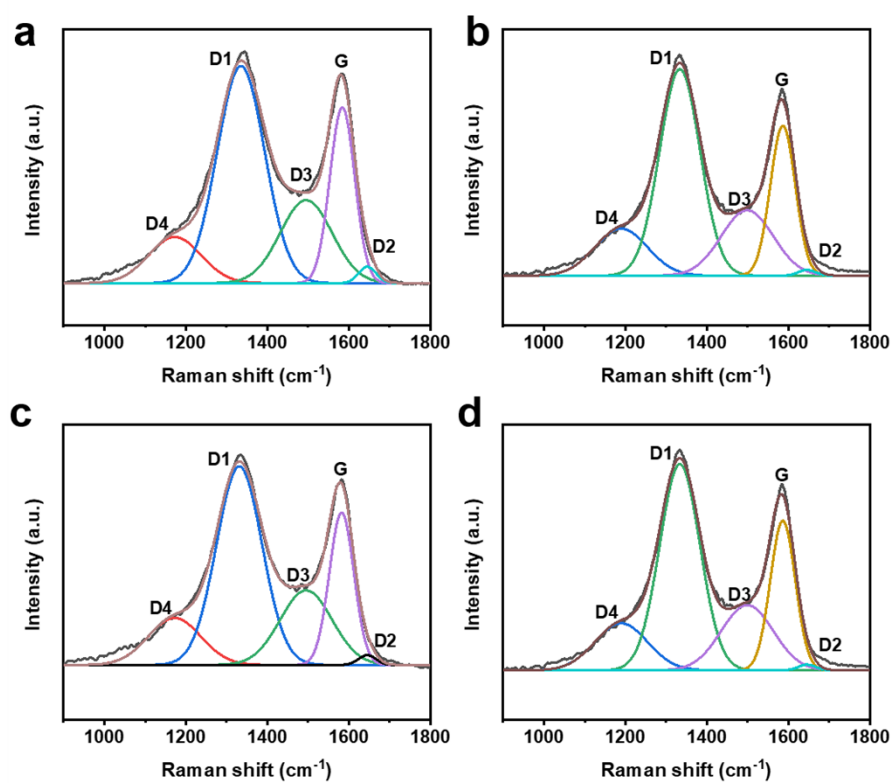

**Figure S2.** Raman spectra deconvolution results of a) CW, b) CW-Pd10, c) CW-Pd20, d) CW-Pd30.

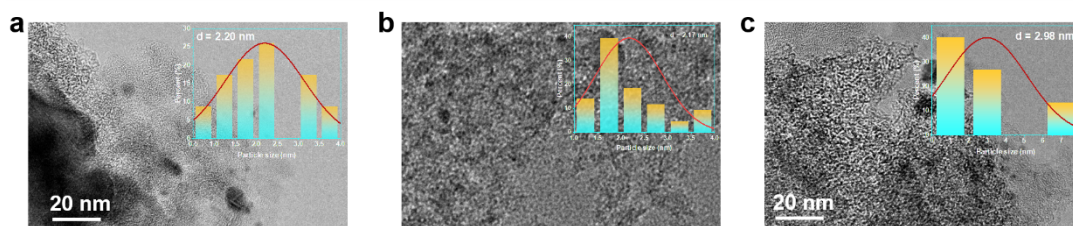

**Figure S3.** TEM images and size distribution (inset) of a) CW-Pd10, b) CW-Pd20, c) CW-Pd30.

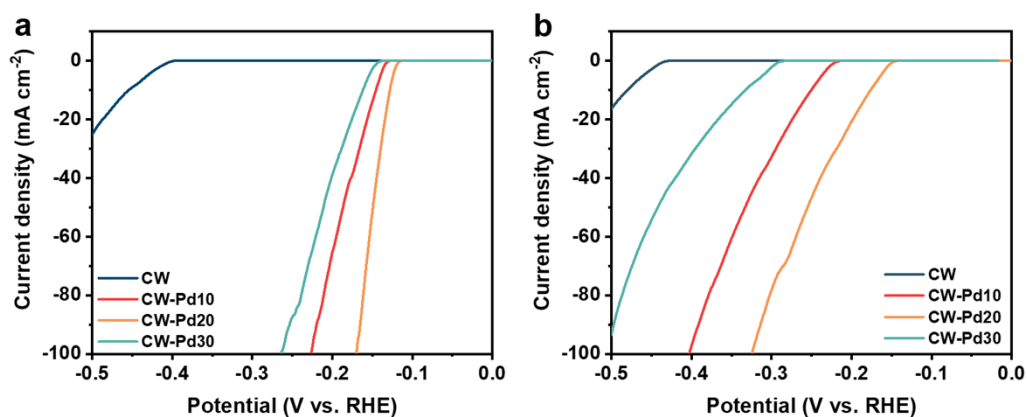

**Figure S4.** LSV curves of CW and CW-Pd with different ALD cycles in a) 0.5M H<sub>2</sub>SO<sub>4</sub>, b) 1M PBS (PH = 7.2)

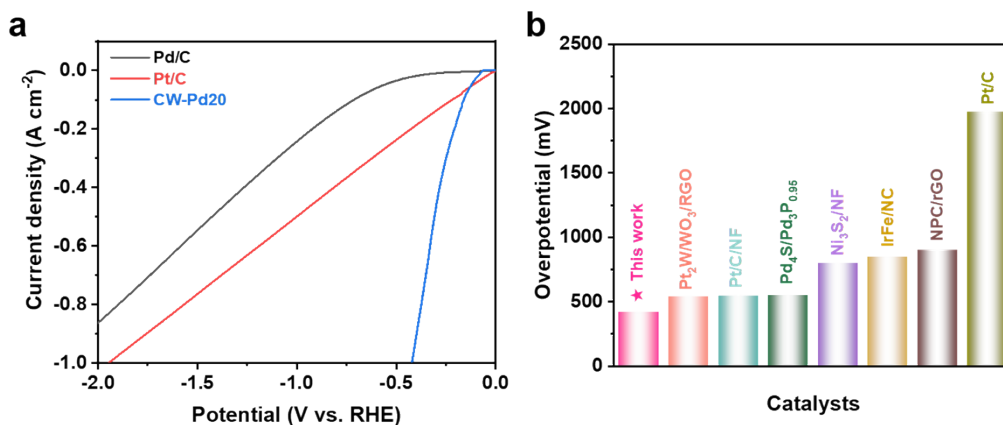

**Figure S5.** (a) LSV curves of CW-Pd20, commercial Pt/C and Pd/C in 1M KOH. (b) the comparison of overpotentials at 1 A cm<sup>-2</sup> for CW-Pd20 and other reported electrocatalysts<sup>1-6</sup>.

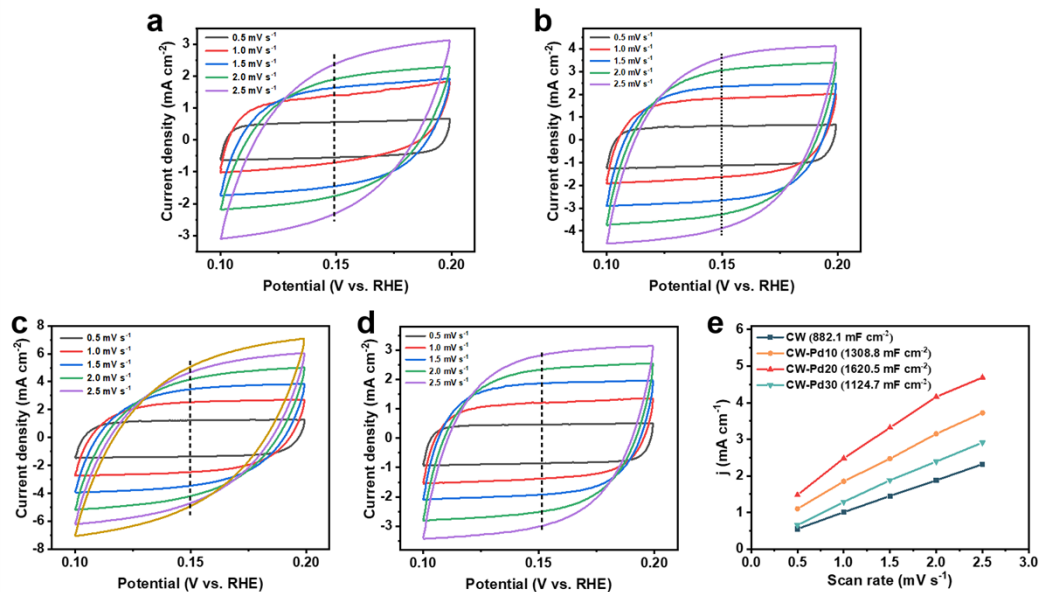

**Figure S6.** CV curves of a) CW, b) CW-Pd10, c) CW-Pd20, d) CW-Pd30. e) The electrochemical double-layer capacitance for CW and CW-Pd with different ALD cycles.

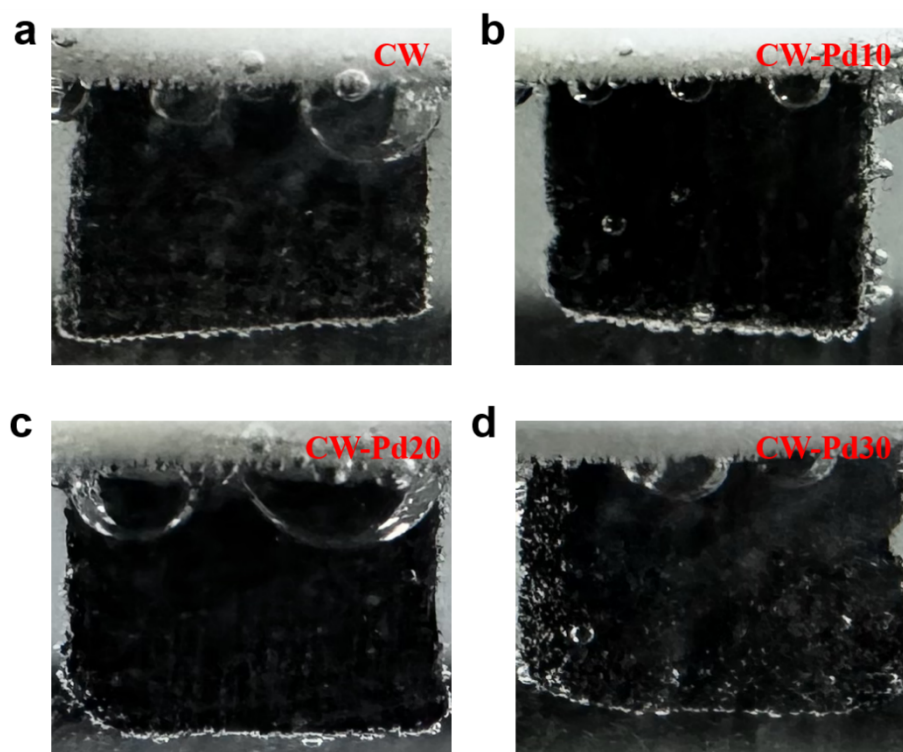

**Figure S7.** The optical figures of a) CW, b) CW-Pd10, c) CW-Pd20, d) CW-Pd30 during HER process.

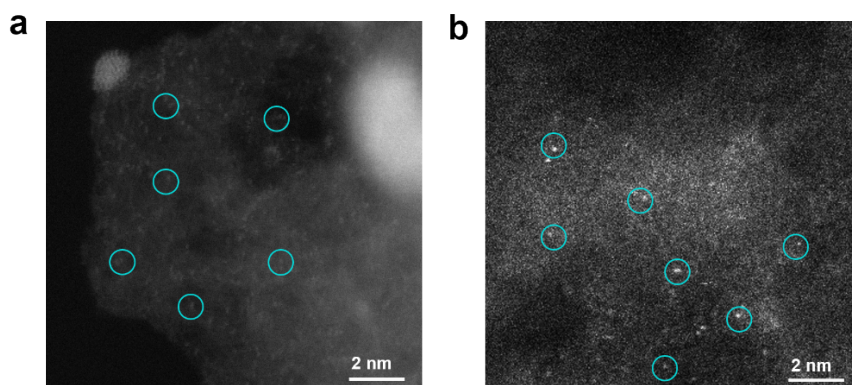

**Figure S8.** The HAADF-STEM images of CW-Pd20 (a) before and (b) after 40h stability test.

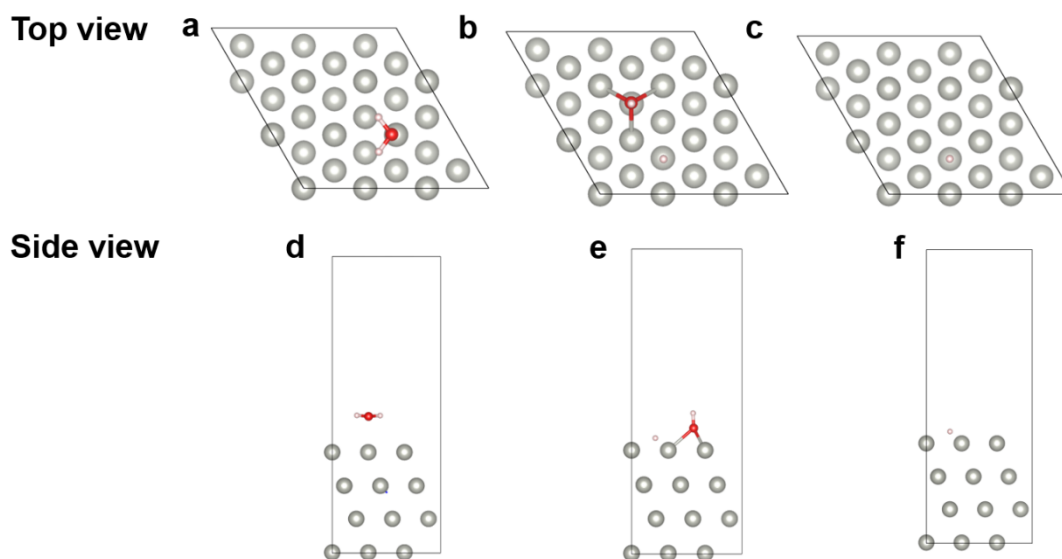

**Figure S9.** Optimized structure of a, d)  $\text{H}_2\text{O}$  adsorbed, b, e)  $\text{H}_2\text{O}$  dissociate, c, f) H adsorbed on Pd (111) containing 4 slabs with 12 Å vacuum layer.

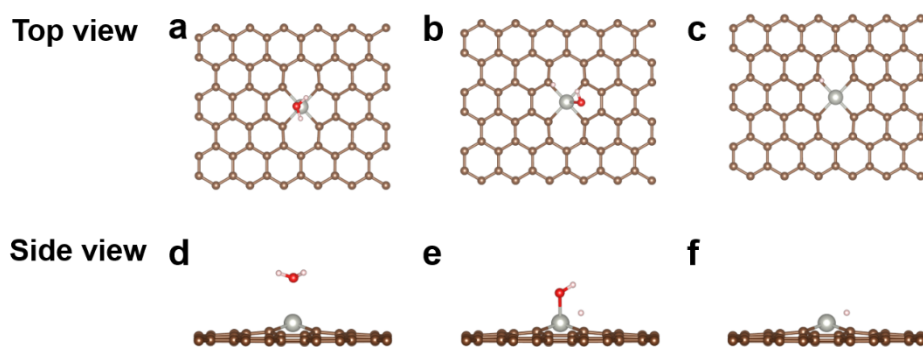

**Figure S10.** Optimized structure of a, d)  $\text{H}_2\text{O}$  adsorbed, b, e)  $\text{H}_2\text{O}$  dissociate, c, f) H adsorbed on  $\text{Pd}_{\text{SA}}$  with 12 Å vacuum layer.

**Table S1.** The Raman fitting results of CW and CW-Pd.

|         | D1   | D2  | D3   | D4   | G    | D1+D4 |
|---------|------|-----|------|------|------|-------|
| CW      | 46.9 | 0.9 | 20.0 | 12.8 | 19.4 | 59.7  |
| CW-Pd10 | 48.0 | 1.7 | 19.7 | 11.4 | 19.2 | 59.4  |
| CW-Pd20 | 46.9 | 0.9 | 20.0 | 12.8 | 19.4 | 59.7  |
| CW-Pd30 | 46.2 | 0.6 | 18.8 | 13.7 | 20.7 | 59.9  |

**Table S2.** Elemental composition of the CW-Pd20 from XPS.

| Catalyst | Pd (wt. %) | C (wt. %) | O (wt. %) |
|----------|------------|-----------|-----------|
| CW-Pd20  | 0.2        | 93.9      | 5.9       |

**Table S3.** Structure information of CW-Pd20 extracted from EXAFS fitting.

| path   | N         | R          | E <sub>0</sub> | sigma <sup>2</sup> | R-factor |
|--------|-----------|------------|----------------|--------------------|----------|
| Pd-C/O | 0.73±0.61 | 2.16±0.082 | 19.7±7.1       | 0.001              | 0.015    |
| Pd-Pd  | 4.61±0.9  | 2.73±0.006 | 4.61±0.9       | 0.005              |          |

## Reference

1. Y. W. Peng, C. Shan, H. J. Wang, L. Y. Hong, S. Yao, R. J. Wu, Z. M. Zhang and T. B. Lu, *Advanced Energy Materials*, 2019, **9**, 1900597.
2. G. Zhang, A. Wang, L. Niu, W. Gao, W. Hu, Z. Liu, R. Wang and J. Chen, *Advanced Energy Materials*, 2022, **12** 2103511.
3. K. Sun, L. Zeng, S. Liu, L. Zhao, H. Zhu, J. Zhao, Z. Liu, D. Cao, Y. Hou, Y. Liu, Y. Pan and C. Liu, *Nano Energy*, 2019, **58**, 862-869.
4. G. Li, J. Yu, J. Jia, L. Yang, L. Zhao, W. Zhou and H. Liu, *Advanced Functional Materials*, 2018, **28**, 1801332.
5. W. He, R. Zhang, D. Cao, Y. Li, J. Zhang, Q. Hao, H. Liu, J. Zhao and H. L. Xin, *Small*, 2022, **19**, 2205719.

6. P. Jiang, H. Huang, J. Diao, S. Gong, S. Chen, J. Lu, C. Wang, Z. Sun, G. Xia, K. Yang, Y. Yang, L. Wei and Q. Chen, *Applied Catalysis B: Environmental*, 2019, **258**, 117965.
